# Supplementary material for: Examining associations of changes in social connectedness with healthcare utilization and costs: A prospective study among Singapore adults
Source: Research Square preprint supplement (doi:10.21203/rs.3.rs-8402329/v1), 2026-01-16
Supplement: Supplementary file 1 [file 8c2406241adece21b99c7e0d.docx]

**Table S1.** Between-group comparison of unadjusted utilization (number of visits) and cost (SGD) at baseline by healthcare setting.

| **Timepoint** | **Healthcare setting** | **Social connection status** | **Utilization (No. of visits)**  **Mean ± SD**  **Median (IQR)** | **Cost (SGD)**  **Mean ± SD**  **Median (IQR)** |
| --- | --- | --- | --- | --- |
| **Baseline** | **In-patient wards** | **Remained socially connected** (n=670) | 0.0 ± 0.2  0 (0 – 0) | 338 ± 2,890  0 (0 – 0) |
|  |  | **Became socially connected** (n=180) | 0.1 ± 0.5  0 (0 – 0) | 790 ± 3,075  0 (0 – 0) |
|  |  | **Remained socially disconnected** (n=200) | 0.2 ± 0.8  0 (0 – 0) | 1,690 ± 8,489  0 (0 – 0) |
|  |  | **Became socially disconnected** (n=132) | 0.2 ± 0.6  0 (0 – 0) | 874 ± 3,811  0 (0 – 0) |
|  |  | *p-value a* | *<0.001a* | *<0.001a* |
|  | **Emergency departments** | **Remained socially connected** (n=670) | 0.1 ± 0.4  0 (0 – 0) | 8.23 ± 65.10  0 (0 – 0) |
|  |  | **Became socially connected** (n=180) | 0.2 ± 0.6  0 (0 – 0) | 13.70 ± 77.50  0 (0 – 0) |
|  |  | **Remained socially disconnected** (n=200) | 0.4 ± 1.1  0 (0 – 0) | 30.40 ± 154  0 (0 – 0) |
|  |  | **Became socially disconnected** (n=132) | 0.3 ± 1.0  0 (0 – 0) | 27.40 ± 157  0 (0 – 0) |
|  |  | *p-value a* | *<0.001* | *0.066* |
|  | **Specialist outpatient clinics** | **Remained socially connected** (n=670) | 1.2 ± 4.0  0 (0 – 0) | 166 ± 798  0 (0 – 0) |
|  | **Became socially connected** (n=180) | 1.8 ± 4.1  0 (0 – 1) | 252 ± 631  0 (0 – 0) |
|  |  | **Remained socially disconnected** (n=200) | 2.8 ± 6.0  0 (0 – 3) | 423 ± 1,011  0 (0 – 367) |
|  |  | **Became socially disconnected** (n=132) | 2.2 ± 5.4  0 (0 – 1) | 358 ± 990  0 (0 – 0) |
|  |  | *p-value a* | *<0.001* | *<0.001* |
|  |  |  |  |  |
|  |  |  |  |
|  |  |  |  |
|  |  |  |  |
|  |  |  |  |  |
|  | **Polyclinics** | **Remained socially connected** (n=670) | 1.3 ± 2.6  0 (0 – 1) | 138 ± 356  0 (0 – 94.20) |
|  |  | **Became socially connected** (n=180) | 1.5 ± 3.3  0 (0 – 1) | 206 ± 633  0 (0 – 115) |
|  |  | **Remained socially disconnected** (n=200) | 2.5 ± 3.9  0 (0 – 4) | 328 ± 534  0 (0 – 468) |
|  |  | **Became socially disconnected** (n=132) | 2.2 ± 4.5  0 (0 – 3) | 255 ± 697  0 (0 – 141) |
|  |  | *p-value a* | *<0.001* | *<0.001* |

a P-values derived from Kruskal-Wallis H tests.
